# Supplementary material
Source: publisher site journal article supplement (https://www.dovepress.com/article/337504)
Supplement: Supplementary file 1 [file get_supplementary_file.php]

## Appendix

### Appendix 1 Eligibility criteria of this overview based on PICOS

|                                                                                                                                                                                                                                                                                                                                                                                                                                                                                                                                                                                                                                                                                                           | Inclusion                                                                                                                                                                                                                                                                                       | Exclusion                                                                                                      |
|-----------------------------------------------------------------------------------------------------------------------------------------------------------------------------------------------------------------------------------------------------------------------------------------------------------------------------------------------------------------------------------------------------------------------------------------------------------------------------------------------------------------------------------------------------------------------------------------------------------------------------------------------------------------------------------------------------------|-------------------------------------------------------------------------------------------------------------------------------------------------------------------------------------------------------------------------------------------------------------------------------------------------|----------------------------------------------------------------------------------------------------------------|
| <b>Type of review</b>                                                                                                                                                                                                                                                                                                                                                                                                                                                                                                                                                                                                                                                                                     | SR, MA, or SR with MA                                                                                                                                                                                                                                                                           | other type of reviews                                                                                          |
| <b>Type of original studies in SRs/MAs</b>                                                                                                                                                                                                                                                                                                                                                                                                                                                                                                                                                                                                                                                                | RCTs or quasi-RCTs                                                                                                                                                                                                                                                                              | other type of trials                                                                                           |
| <b>Participants in SRs/MAs</b>                                                                                                                                                                                                                                                                                                                                                                                                                                                                                                                                                                                                                                                                            | women with PMI                                                                                                                                                                                                                                                                                  | women with pre- or post- menopausal insomnia, or women with PMI combined with other physical or mental illness |
| <b>Treatment group in SRs/MAs</b>                                                                                                                                                                                                                                                                                                                                                                                                                                                                                                                                                                                                                                                                         | (i) acupuncture<br>(ii) acupuncture combined with CBT-I, or drug (CHM, psychotropic substances, HRT, and/or oryzanol)                                                                                                                                                                           | Tui-na/massage, Gua-sha (scraping therapy), cupping, or other TCM-related therapies                            |
| <b>Control group in SRs/MAs</b>                                                                                                                                                                                                                                                                                                                                                                                                                                                                                                                                                                                                                                                                           | (i) waitlist control/blank control<br>(ii) placebo-/sham- acupuncture<br>(iii) CBT-I, or drug (CHM, psychotropic substances, HRT, and/or oryzanol)                                                                                                                                              | (i) acupuncture<br>(ii) acupuncture combined with other therapies                                              |
| <b>Outcomes in SRs/MAs</b>                                                                                                                                                                                                                                                                                                                                                                                                                                                                                                                                                                                                                                                                                | (i) primary outcome: subjective and/or objective indices related to sleep, and/or total clinical effectiveness rate<br>(ii) secondary outcomes: scales/questionnaires related to mood, climacteric symptoms, and/or quality of life, and/or reproductive hormone levels<br>(iii) adverse events | SR/MA without any primary outcome                                                                              |
| <p><b>Notes:</b> acupuncture includes traditional needle acupuncture (manual acupuncture and electroacupuncture stimulating on any part of human body), and modified forms of acupuncture (fire acupuncture, laser acupuncture, auricular therapy, triangle-edged needle, cutaneous acupuncture, intradermal/thumbtack needling, acupoint application, catgut implantation at acupoint, and moxibustion)</p> <p><b>Abbreviations:</b> SR, systematic review; MA, meta-analysis; RCTs, randomized controlled trials; TCM, traditional Chinese medicine; CHM, Chinese herbal medicine; PMI, perimenopausal insomnia; HRT, hormone replacement therapy; CBT-I, cognitive behavioral therapy for insomnia</p> |                                                                                                                                                                                                                                                                                                 |                                                                                                                |

## Appendix 2 Search strategy

The following search strategy was used for MEDLINE via PubMed while it was also suitable for other English and Chinese electronic databases.

| Number | Search terms                                |
|--------|---------------------------------------------|
| #1     | insomnia [MeSH Terms]                       |
| #2     | insomnia [TIAB]                             |
| #3     | sleepless [TIAB]                            |
| #4     | sleep disorder [TIAB]                       |
| #5     | sleep initiation dysfunction [TIAB]         |
| #6     | sleep maintain dysfunction [TIAB]           |
| #7     | #1 or #2 or #3 or #4 or #5 or #6            |
| #8     | acupuncture [MeSH Terms]                    |
| #9     | acupuncture [TIAB]                          |
| #10    | electropuncture [TIAB]                      |
| #11    | manual acupuncture [TIAB]                   |
| #12    | auricular acupuncture [TIAB]                |
| #13    | acupuncture point [TIAB]                    |
| #14    | acupoint [TIAB]                             |
| #15    | #8 or #9 or #10 or #11 or #12 or #13 or #14 |
| #16    | menopause [TIAB]                            |
| #17    | climacteric [TIAB]                          |
| #18    | climacterium [TIAB]                         |
| #19    | perimenopause [TIAB]                        |
| #20    | # 16 or #17 or #18 or #19                   |
| #21    | meta analysis [MeSH Terms]                  |
| #22    | systematic review [TIAB]                    |
| #23    | meta-analysis [TIAB]                        |
| #24    | meta-analyses [TIAB]                        |
| #25    | meta [TIAB]                                 |
| #26    | #21 or #22 or #23 or #24 or #25             |
| #27    | #7 and #15 and #20 and #26                  |

### Appendix 3 Detailed information for excluded SRs/MAs

| References                                                                                                                                                                                                                                                                        | Reasons for exclusion                                                                        |
|-----------------------------------------------------------------------------------------------------------------------------------------------------------------------------------------------------------------------------------------------------------------------------------|----------------------------------------------------------------------------------------------|
| Peng YJ, Zhong LL, Huang YC, Li ZP. Systematic review of therapeutic efficacy and safety of acupuncture therapy for treatment of perimenopausal insomnia in comparison with Western medicine [article in Chinese]. <i>J Guangzhou Univ Tradit Chin Med</i> , 2021; 38(4):846-854. | treatment group included cupping therapy                                                     |
| Ni YY, Wang QC, Zhang W, Zhang W, Xie F, Wang JC, Li YW. Meta-analysis of the curative effect of acupuncture on perimenopausal insomnia [article in Chinese]. <i>Maternal and Child Health Care of China</i> , 2021; 36(8):1942-1946.                                             | control group included acupuncture (catgut implantation at acupoint)                         |
| Peng SQ, Ding YL, Hong SM, Yan XN, Xiao SW. Meta-analysis of the effect of auricular acupoint plaster therapy in patients with perimenopausal insomnia [article in Chinese]. <i>China Health Standard Management</i> , 2020; 11(6):103-106.                                       | control group included acupuncture (auricular therapy)                                       |
| Chiu HY, Hsieh YJ, Tsai PS. Acupuncture to reduce sleep disturbances in perimenopausal and postmenopausal women: A systematic review and meta-analysis. <i>Obstet Gynecol</i> , 2016; 127(3):507-515.                                                                             | treatment group included Tui-na/massage; subjects contained peri- and post- menopausal women |
| Fan Y. Literature and clinical study of acupuncture combined with intradermal acupuncture in the treatment of perimenopausal insomnia [article in Chinese]. <i>Doctorate thesis</i> , 2015; Guangzhou University of Chinese Medicine.                                             | treatment group included Guasha (scraping therapy)                                           |
| Wu XL, Jiang XY, Cai YM, Hu R, Yang XL, Xie WY. Effect of Chinese medicine physiotherapy on sleep quality of perimenopausal women: a meta-analysis [article in Chinese]. <i>Chinese Journal of Social Medicine</i> , 2020; 37(2):197-201.                                         | treatment group included Guasha (scraping therapy)                                           |

**Appendix 4 Six-dimension multivariate assessment and rank of included SRs/MAs**

| Study                                          | Year of publication | Type of study | AMSTAR-2 score | PRISMA score | Homogeneity  | Publication bias                                  | Average score of rank number in each study/Veritas score |
|------------------------------------------------|---------------------|---------------|----------------|--------------|--------------|---------------------------------------------------|----------------------------------------------------------|
| He <i>et al</i> 2021 [25]                      | 2021 (9)            | RCTs (9)      | 12.5 (8)       | 24.5 (8)     | Moderate (6) | Assessed [Funnel plot] (9)                        | 8.2                                                      |
| Li <i>et al</i> 2020 [26]                      | 2020 (5)            | RCTs (9)      | 10 (3)         | 20.5 (2)     | Low (4)      | Not assessed (2)                                  | 4.2                                                      |
| Ma <i>et al</i> 2020 [27]                      | 2020 (5)            | RCTs (9)      | 11 (6)         | 23.5 (5)     | High (9)     | Partially assessed [n ≤ 10] (4)                   | 6.3                                                      |
| Wang 2021 [28]                                 | 2021 (9)            | RCTs (9)      | 11 (6)         | 24.5 (8)     | High (9)     | Assessed [Funnel plot] (9)                        | 8.3                                                      |
| Zhang <i>et al</i> 2016 [29]                   | 2016 (2)            | RCTs (9)      | 11.5 (7)       | 23 (4)       | High (9)     | Assessed [Funnel plot] (9)                        | 6.7                                                      |
| Zhang <i>et al</i> 2012 [30]                   | 2012 (1)            | RCTs (9)      | 9 (1)          | 22 (3)       | Low (4)      | Not assessed (2)                                  | 3.3                                                      |
| Zhao <i>et al</i> 2021 [11]                    | 2021 (9)            | RCTs (9)      | 15 (9)         | 27 (9)       | Low (4)      | Assessed [Egger's test] (9)                       | 8.2                                                      |
| Zhou <i>et al</i> 2020 [31]                    | 2020 (5)            | RCTs (9)      | 10 (3)         | 20.5 (2)     | Moderate (6) | Partially assessed [no description of method] (4) | 4.8                                                      |
| Jiang <i>et al</i> 2021 [32]                   | 2021 (9)            | RCTs (9)      | 11 (6)         | 24 (6)       | Low (4)      | Assessed [Funnel plot + Egger's test] (9)         | 7.2                                                      |
| Average score of rank number in each dimension | 6.0                 | 9.0           | 5.4            | 5.2          | 6.1          | 6.3                                               | 6.4                                                      |

**Abbreviations:** RCTs, randomized controlled trials
